# Supplementary material for: Dominant role of OH− and Ti3+ defects on the electronic structure of TiO2 thin films for water splitting
Source: Royal Society of Chemistry journal article supplement (doi:10.1039/d2dt01871c), 2022-01-01
Supplement: d2dt01871c1.pdf [file d2dt01871c1.pdf]

## Supplementary Information

### **Dominant role of OH<sup>-</sup> and Ti interstitial defects on the electronic structure of TiO<sub>2</sub> thin films for water splitting**

Maria-Isabel Mendoza-Diaz,<sup>a</sup> Andrea Balocchi,<sup>b</sup> Kolade A. Oyekan,<sup>c</sup> Kui Tan,<sup>c</sup> William G.

Vandenberghe,<sup>c</sup> Alain Esteve<sup>a</sup> and Carole Rossi<sup>\*a</sup>

<sup>a</sup> *LAAS-CNRS, University of Toulouse, 7 Avenue du colonel Roche, 31400 Toulouse, France*

<sup>b</sup> *INSA-CNRS-UPS, LPCNO, University of Toulouse, 135 avenue de Rangueil, 31077 Toulouse, France*

<sup>c</sup> *Department of Materials Science and Engineering, University of Texas at Dallas, Richardson, TX (USA)*

\* Corresponding Author.

E-mail: [rossi@laas.fr](mailto:rossi@laas.fr), (C. Rossi). Tel. +33-05-6133-6301

**Keywords:** TiO<sub>2</sub>, photocatalyst, photoluminescence, H<sub>2</sub> production, water splitting, band structure

## **S1. Structural, morphological and mechanical properties**

### **Crystallite diameter calculation with Scherrer's formula**

The respective crystallite diameter for the anatase and rutile was be estimated from the GI-XRD pattern using the Scherrer's formula <sup>1</sup>:

$$D_{hkl} = \frac{k \lambda}{\beta_{hkl} \cos\theta} \quad (\text{Eq. S2})$$

Where  $k$  is the shape factor for Cu target (0.89),  $\lambda$  is the X-ray wavelength of the Cu K $\alpha$  radiation (0.154 nm),  $\theta$  is the Bragg's angle of anatase (101) and rutile (110) peaks, and  $\beta$  is the full-width half-maximum (FWHM) of the corresponding diffraction peak.

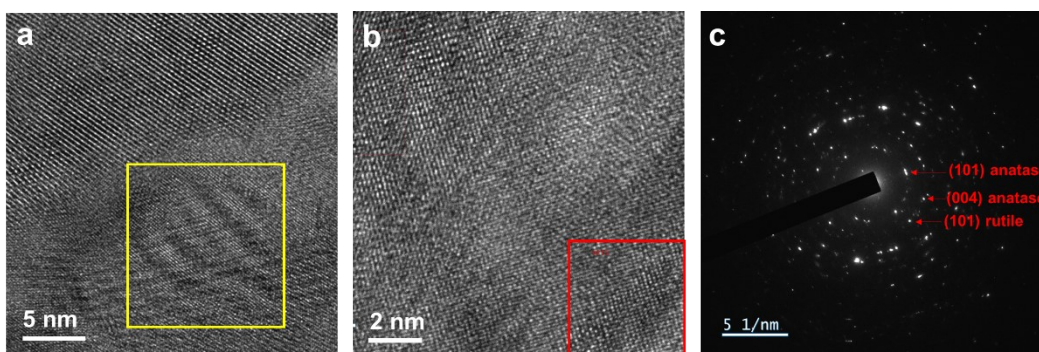

**Figure S1-1** High-resolution images of  $\text{TiO}_2$  film as deposited on silicon (T-AD) (a) square showing the Moiré fringes resulted from the combination of lattice fringes of anatase and rutile, (b) cross-section depicting the selected area for the selected area electron diffraction (SAED). (c) Electron diffraction pattern, anatase and rutile planes determined from the inverse of the radius ring.

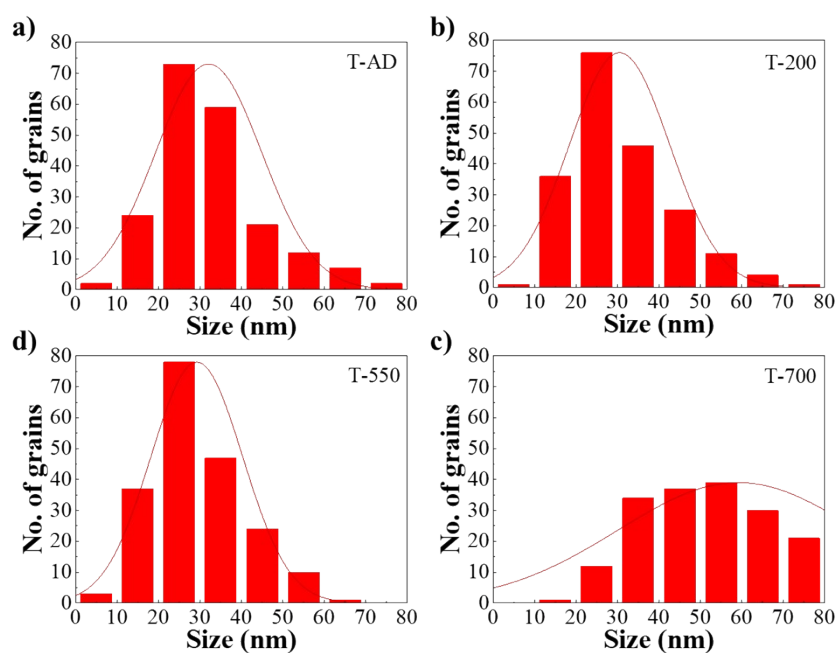

**Figure S1-2.** Grain size distribution obtained from SEM measurements for  $\text{TiO}_2$  films on silicon (a) as-deposited, and annealed at (b) 200, (c) 550 and (d) 700°C.

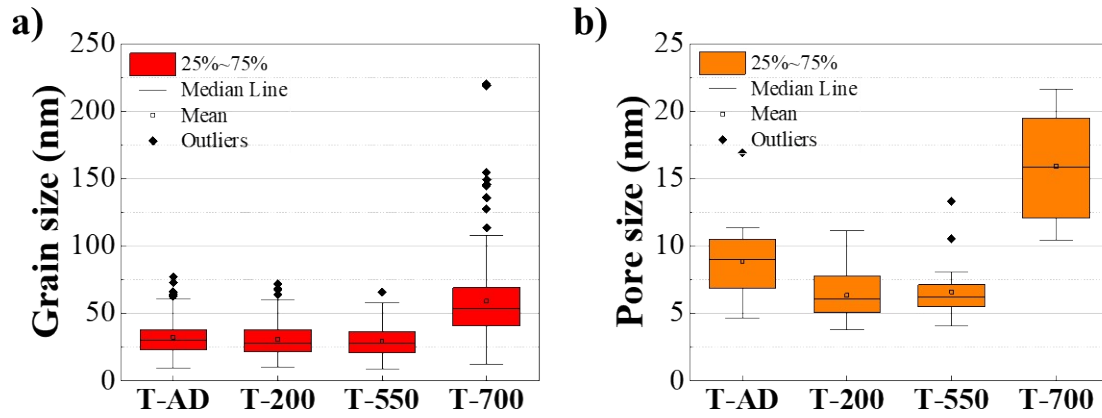

**Figure S1-3.** (a) Grain and (b) pore size distribution obtained from SEM measurements for TiO<sub>2</sub> films on silicon (a) as-deposited, and annealed at (b) 200, (c) 550 and (d) 700°C.

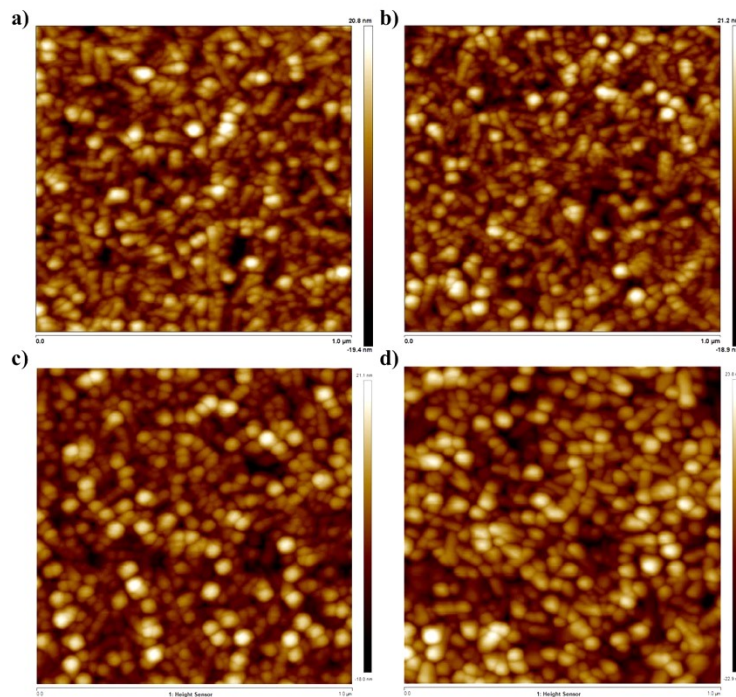

**Figure S1-4.** 2D AFM images of TiO<sub>2</sub> films deposited on silicon (a) as-deposited, and annealed at (b) 200, (c) 550 and (d) 700°C.

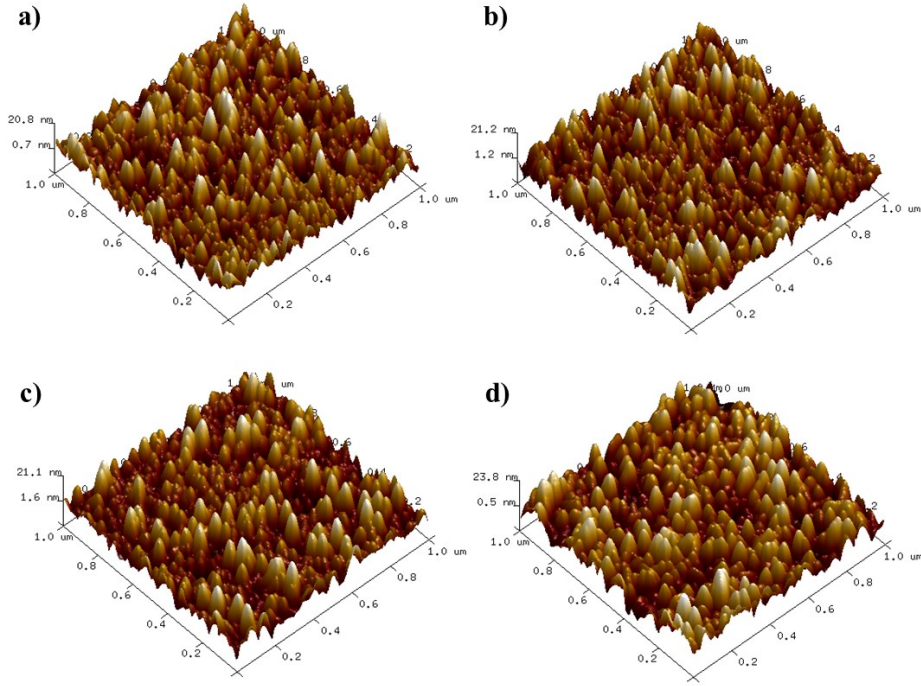

**Figure S1-5** 3D AFM images of  $\text{TiO}_2$  films deposited on silicon (a) as-deposited, and annealed at (b) 200, (c) 550 and (d) 700°C.

### Tensile stress test calculation

The residual stress was estimated by measuring the radii of curvature of bare silicon substrates and the substrates with the as-deposited and annealed films. After measuring the radii of curvature  $R$  due to bending, the residual stress ( $\sigma$ ) is calculated by using Stoney's equation <sup>2</sup>:

$$\sigma = \frac{E_s}{6(1-\nu_s)} \frac{t_s^2}{t_c} \left( \frac{1}{R} - \frac{1}{R_0} \right) \quad (\text{Eq. S2})$$

Where  $E_s$ ,  $\nu_s$ ,  $t_s$  and  $t_c$  are the Young's modulus, Poisson ratio and thickness of the substrate (500  $\mu\text{m}$ ) and film (0.27  $\mu\text{m}$ ).  $R_0$  and  $R$  are radii of curvature of the bare substrate and sample film-substrate, respectively.

**Table S1.** Average residual tensile stress parameters of  $\text{TiO}_2$  thin films.

| Sample | Average Stress (MPa) | R (m) | Std. Dev. (MPa)      |
|--------|----------------------|-------|----------------------|
| T-AD   | 191.00               | 160.8 | $7.46 \cdot 10^{-8}$ |
| T-200  | 315.50               | 97.35 | $7.78 \cdot 10^{-8}$ |
| T-550  | 605.50               | 50.72 | $8.24 \cdot 10^{-8}$ |
| T-700  | 638.30               | 48.11 | $7.76 \cdot 10^{-8}$ |

## S2. H<sub>2</sub> evolution

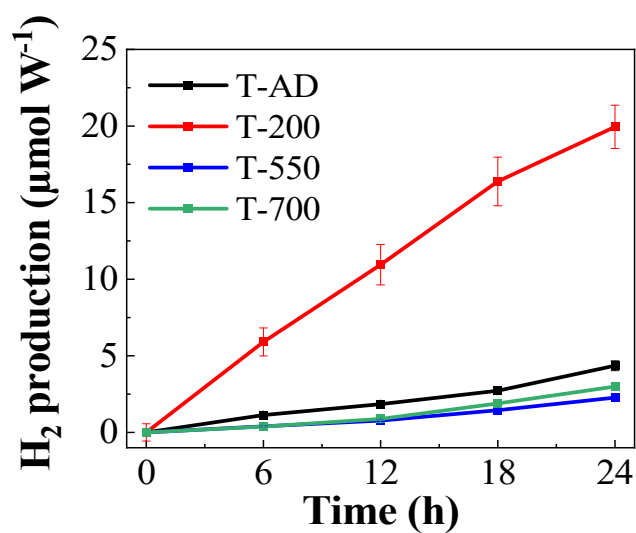

**Figure S2.** Hydrogen production over 24 h of TiO<sub>2</sub> films deposited on silicon: as-deposited (T-AD) and annealed at 200 (T-200), 550 (T-550) and 700°C (T-700). Xe lamp used for irradiation.

### S3. Chemical characterization

*Table S3. Details of XPS spectra binding energies of TiO<sub>2</sub> thin films. BE in eV.*

| Samples | Ti <sup>4+</sup> (2p <sub>3/2</sub> ) | Ti <sup>3+</sup> (2p <sub>3/2</sub> ) | Ti <sup>4+</sup> (2p <sub>1/2</sub> ) | Ti <sup>3+</sup> (2p <sub>1/2</sub> ) | O1s HE | O1s LE |
|---------|---------------------------------------|---------------------------------------|---------------------------------------|---------------------------------------|--------|--------|
| T-AD    | 459.16                                | 457.72                                | 464.86                                | 463.32                                | 532.82 | 530.37 |
| T-200   | 458.85                                | 457.51                                | 464.53                                | 463.11                                | 532.46 | 530.06 |
| T-550   | 458.94                                | 457.46                                | 464.63                                | 463.06                                | 531.39 | 530.12 |
| T-700   | 458.71                                | 457.23                                | 464.41                                | 462.93                                | 531.88 | 530.36 |

#### Calculation of TiO<sub>2</sub> surface stoichiometry

The stoichiometry of the TiO<sub>2</sub> surface, in terms of O<sup>2-</sup>/Ti<sup>4+</sup> atomic ratio was calculated from the mathematical area  $I$  of the O 1s Low Energy component (O-Ti) and the Ti 2p<sub>2/3</sub> and 2p<sub>1/2</sub> peaks, of the XPS O1s and Ti2p core level spectra as follows:

$$\frac{O}{Ti} = \frac{I_O}{\frac{I_{Ti\ 2p_1}}{2} + \frac{I_{Ti\ 2p_3}}{2}} \quad (\text{Eq. S4})$$

#### S4. Optical properties

The absorption coefficient  $\alpha$ , was determined from the transmittance spectra, using the expression <sup>3</sup>:

$$\alpha = \frac{\ln\left(\frac{1}{T}\right)}{d} \quad (\text{Eq. S5-1})$$

Where T is the transmittance of the film at each wavelength and d is the thickness of the film in cm.

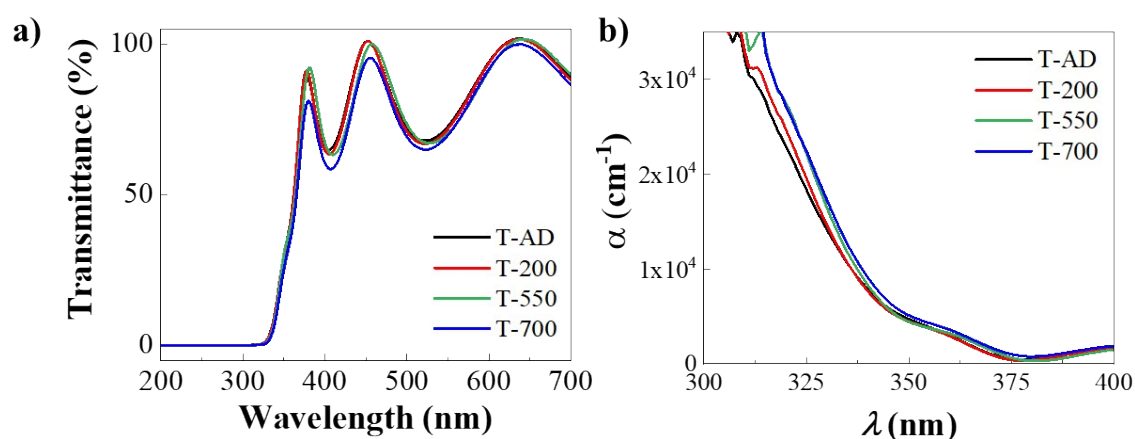

**Figure S4-1.** (a) UV-vis transmittance spectra and (b) Absorption coefficient spectra of TiO<sub>2</sub> films deposited on quartz (determined from transmittance spectra).

The absorption edge was estimated from the absorption coefficient in the exponential tail with values of  $\alpha < 1 \cdot 10^4 \text{ cm}^{-1}$  with a linear fitting where  $R^2 = 0.99$  <sup>4</sup>. The absorption edge values are reported in **Table S4**.

**Table S4.** Absorption edge of TiO<sub>2</sub> thin films determined from transmittance spectra.

| Samples | Absorption edge (nm) |
|---------|----------------------|
| T-AD    | 356.13               |
| T-200   | 354.02               |
| T-550   | 354.07               |



The optical band gap  $E_g$  was calculated from using the relation <sup>4</sup>:

$$\alpha h\nu \propto (h\nu - E_g)^n \quad (\text{Eq. S5-2})$$

Where  $h\nu$  is the photon energy (eV) and  $n$  is 2 for the indirect allowed transition in  $\text{TiO}_2$ . The

Tauc plots were obtained by plotting  $(\alpha h\nu)^{\frac{1}{2}}$  versus  $h\nu$  as shown in the **Figure S7a**. The slope located at high energies was extrapolated by linear fit to the baseline ( $R^2 = 0.99$ ).

The Urbach energy  $E_u$  is defined by <sup>5</sup>:

$$\alpha = \alpha_0 \left( \frac{h\nu}{E_u} \right) \quad (\text{Eq. S5-3})$$

Where  $\alpha$  is the previously mentioned absorption coefficient and  $\alpha_0$  is a constant. The Urbach energy is calculated by plotting  $\ln \alpha$  versus  $h\nu$  as shown in the **Figure S5-2b**. The reciprocal of the slope in the linear portion gives the  $E_u$ .

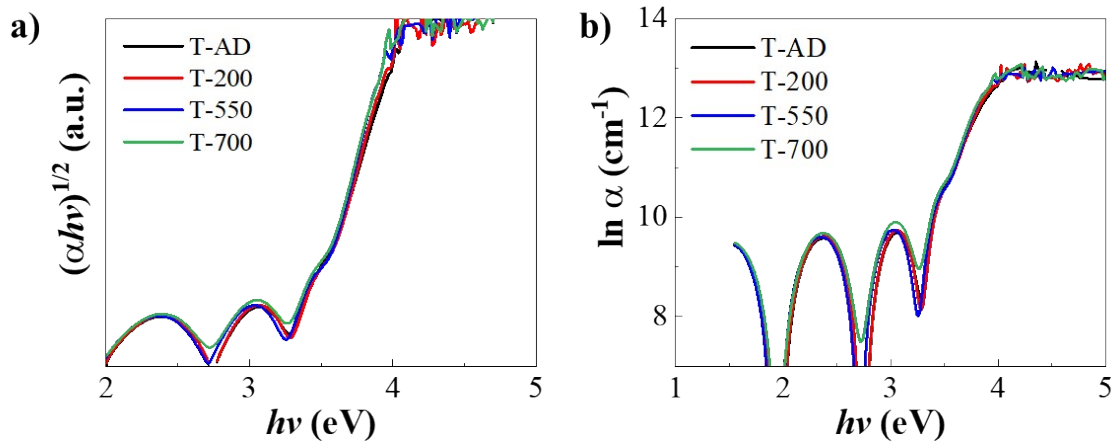

**Figure S4-2.** (a) Tauc plots and (b) Plot of  $\ln \alpha$  versus  $h\nu$  for the Urbach energy determination of  $\text{TiO}_2$  films deposited by PVD on quartz. Plots determined from transmittance spectra.

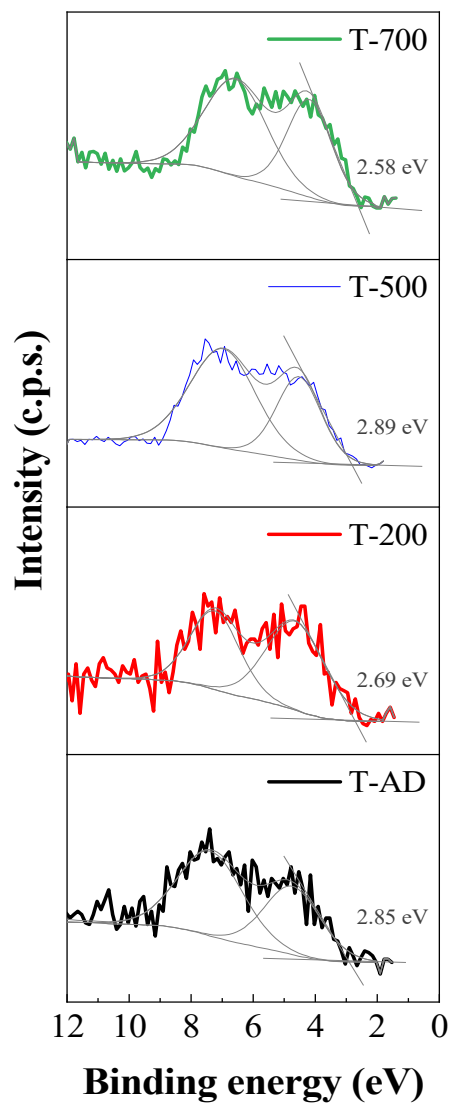

**Figure S4-3.** Calculated valence band edge of TiO<sub>2</sub> films as-deposited (T-AD) and annealed at 200 (T-200), 550 (T-500) and 700 °C (T-700). Lines indicate the intersection of the TiO<sub>2</sub> O<sub>2</sub>p orbital with the baseline.

## S5. PL measurements

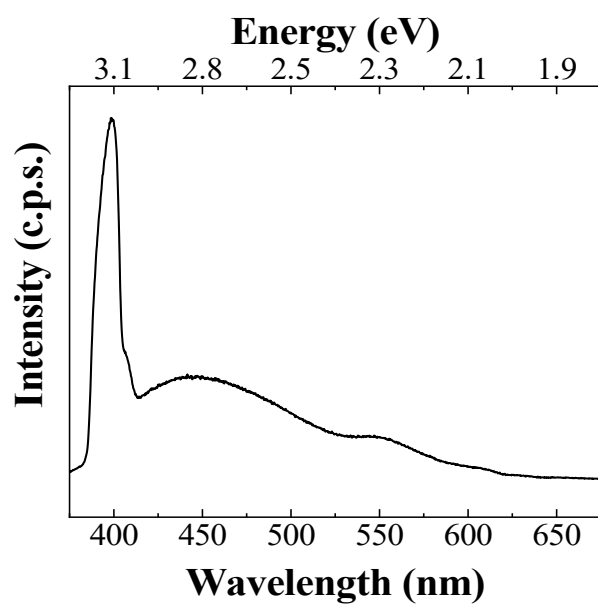

**Figure S5.** Photoluminescence spectra at room temperature of ethanol excited at 355 nm.

*Ethanol in quartz cell.*

## S6. Density functional theory (DFT) calculations

### Computational details

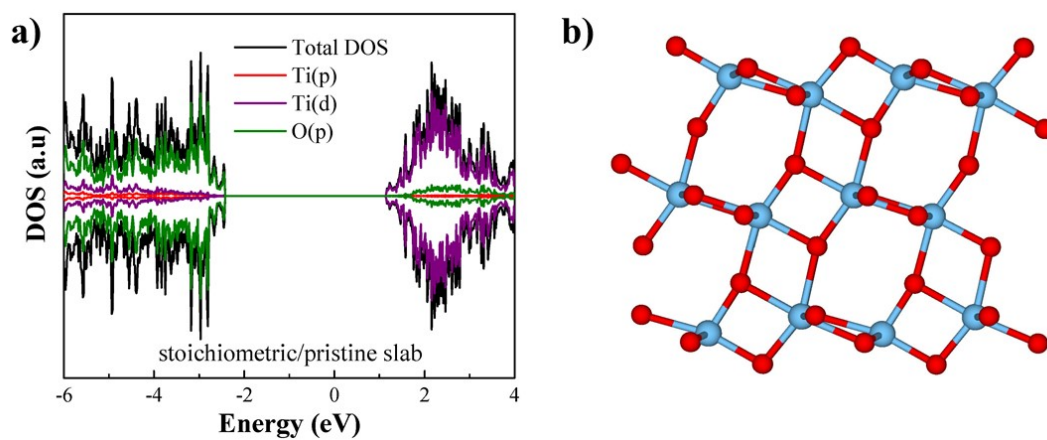

**Figure S6-1.** (a) Density of states (DOS) and (b) side view of stoichiometric 1 x 3 anatase (101) slab. Red: titanium, cyan: oxygen atoms.

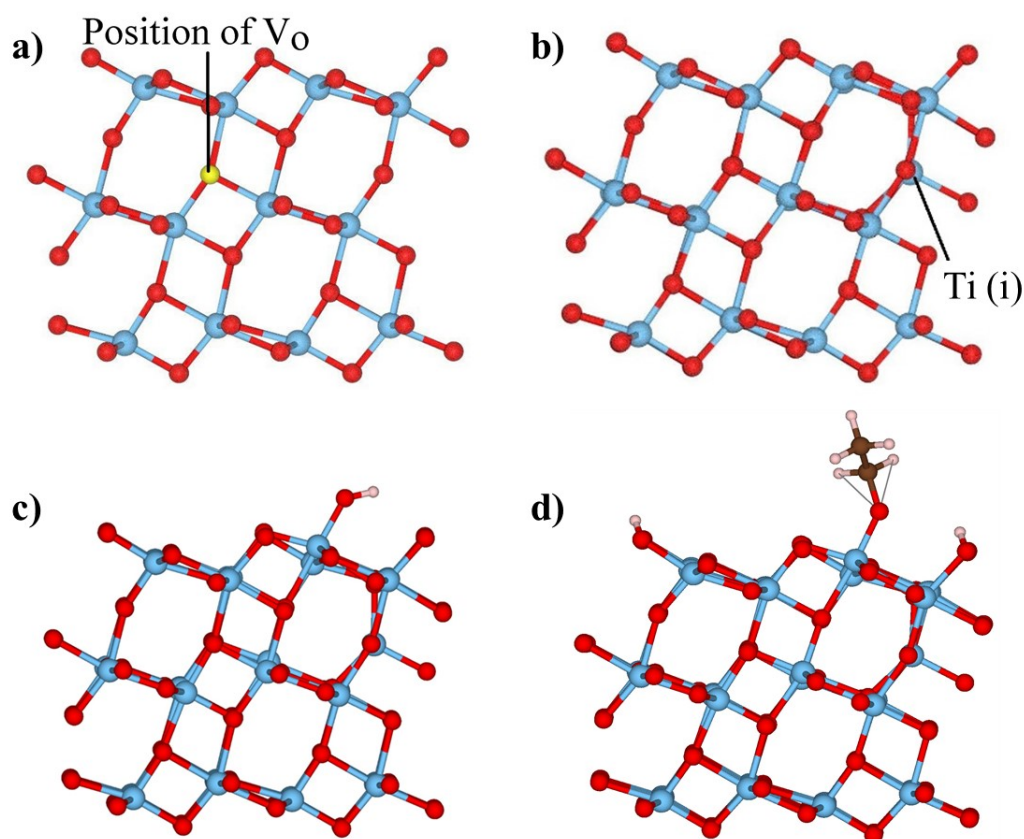

**Figure S6-2.** Side view of (a) stoichiometric 1 x 3 anatase (101) slab, (b) defective slab with an oxygen vacancy (Vo-slab), (c) defective slab with a Ti interstitial (Ti(i)-slab); and, (d)

adsorption of ethanol on defective slab with a Ti interstitial (Ti(i)-slab). Red: titanium, cyan: oxygen, brown: carbon, beige: hydrogen atoms; and, yellow: oxygen vacancy (Vo).

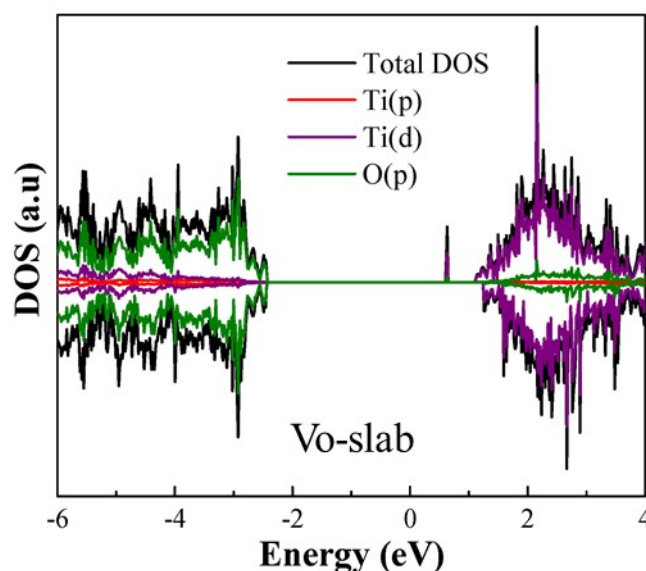

**Figure S6-3.** (a) Density of states (DOS) plots of stoichiometric 1 x 3 anatase (101) slab with an oxygen vacancy (Vo).

## References

- (1) Matěj, Z.; Kužel, R.; Nichtová, L. X-Ray Diffraction Analysis of Residual Stress in Thin Polycrystalline Anatase Films and Elastic Anisotropy of Anatase. *Metall and Mat Trans A* **2011**, *42* (11), 3323–3332. <https://doi.org/10.1007/s11661-010-0468-z>.
- (2) Xu, S.; Tay, B. K.; Tan, H. S.; Zhong, L.; Tu, Y. Q.; Silva, S. R. P.; Milne, W. I. Properties of Carbon Ion Deposited Tetrahedral Amorphous Carbon Films as a Function of Ion Energy. *Journal of Applied Physics* **1996**, *79* (9), 7234–7240. <https://doi.org/10.1063/1.361440>.
- (3) Sofi, A. H.; Shah, M. A.; Asokan, K. Structural, Optical and Electrical Properties of ITO Thin Films. *Journal of Elec Materi* **2018**, *47* (2), 1344–1352. <https://doi.org/10.1007/s11664-017-5915-9>.
- (4) Davis, E. A.; Mott, N. F. Conduction in Non-Crystalline Systems V. Conductivity, Optical Absorption and Photoconductivity in Amorphous Semiconductors. *Philosophical Magazine* **1970**, *22* (179), 0903–0922. <https://doi.org/10.1080/14786437008221061>.
- (5) Dow, J. D.; Redfield, D. Toward a Unified Theory of Urbach's Rule and Exponential Absorption Edges. *Phys. Rev. B* **1972**, *5* (2), 594–610. <https://doi.org/10.1103/PhysRevB.5.594>.
